# Supplementary material for: Polychlorinated Biphenyl Exposures and Cognition in Older U.S. Adults: NHANES (1999–2002)
Source: PubMed Central journal article supplement (PMC3888566; doi:10.1289/ehp.1306532), 2013-11-25
Supplement: ehp.1306532.s001.508.pdf [file ehp.1306532.s001.508.pdf]

**Supplemental Material**

**Polychlorinated Biphenyl Exposures and Cognition in Older U.S. Adults:  
NHANES (1999–2002)**

Maryse F. Bouchard, Youssef Oulhote, Sharon K. Sagiv, Dave Saint-Amour, and Jennifer

Weuve

**Table S1.** Distribution of serum PCB concentrations in the study population, stratified for sex and age (n = 708). Statistics not weighted, NHANES 1999-2002, individuals 60 to 84 years.

|                                              | Percentiles |      |      |      |      | Percentiles |      |      |      |       |
|----------------------------------------------|-------------|------|------|------|------|-------------|------|------|------|-------|
|                                              | min         | 25   | 50   | 75   | max  | min         | 25   | 50   | 75   | max   |
| <b>Women (n = 374)<sup>a</sup></b>           |             |      |      |      |      |             |      |      |      |       |
| Not lipid-standardized<br>(wet weight), ng/g |             |      |      |      |      |             |      |      |      |       |
| Dioxin-like PCBs                             | 0.06        | 0.23 | 0.36 | 0.49 | 1.93 | 0.06        | 0.31 | 0.45 | 0.71 | 2.08  |
| Non-dioxin-like PCBs                         | 0.30        | 0.91 | 1.36 | 1.94 | 7.26 | 0.37        | 1.17 | 1.68 | 2.56 | 9.77  |
| Total PCBs                                   | 0.40        | 1.16 | 1.74 | 2.40 | 8.28 | 0.44        | 1.50 | 2.12 | 3.41 | 11.82 |
| Lipid-standardized,<br>ng/g                  |             |      |      |      |      |             |      |      |      |       |
| Dioxin-like PCBs                             | 10          | 34   | 50   | 71   | 245  | 9           | 47   | 70   | 102  | 366   |
| Non-dioxin-like PCBs                         | 40          | 132  | 194  | 279  | 1205 | 57          | 166  | 252  | 379  | 1285  |
| Total PCBs                                   | 52          | 171  | 246  | 362  | 1374 | 69          | 216  | 320  | 475  | 1446  |
| <b>Men (n = 334)<sup>b</sup></b>             |             |      |      |      |      |             |      |      |      |       |
| Not lipid-standardized (wet weight), ng/g    |             |      |      |      |      |             |      |      |      |       |
| Dioxin-like PCBs                             | 0.06        | 0.16 | 0.23 | 0.36 | 1.19 | 0.06        | 0.18 | 0.27 | 0.43 | 3.78  |
| Non-dioxin-like PCBs                         | 0.28        | 1.00 | 1.33 | 2.04 | 7.63 | 0.31        | 1.07 | 1.48 | 2.12 | 17.10 |
| Total PCBs                                   | 0.35        | 1.20 | 1.60 | 2.38 | 8.04 | 0.37        | 1.28 | 1.76 | 2.58 | 20.88 |
| Lipid-standardized,<br>ng/g                  |             |      |      |      |      |             |      |      |      |       |
| Dioxin-like PCBs                             | 8           | 24   | 36   | 51   | 197  | 10          | 29   | 44   | 70   | 506   |
| Non-dioxin-like PCBs                         | 36          | 157  | 220  | 287  | 1134 | 48          | 176  | 246  | 343  | 1164  |
| Total PCBs                                   | 44          | 181  | 256  | 336  | 1217 | 58          | 216  | 296  | 421  | 1513  |

<sup>a</sup>Age 60-69 years (n = 209); age 70-84 years (n = 165).

<sup>b</sup>Age 60-69 years (n = 152); age 70-84 years (n = 182).
